# Supplementary material
Source: PubMed Central journal article supplement (PMC3014008)
Supplement: supp_ASN.2009101077_Suppl_figureandfigure_text.pdf [file supp_ASN.2009101077_Suppl_figureandfigure_text.pdf]

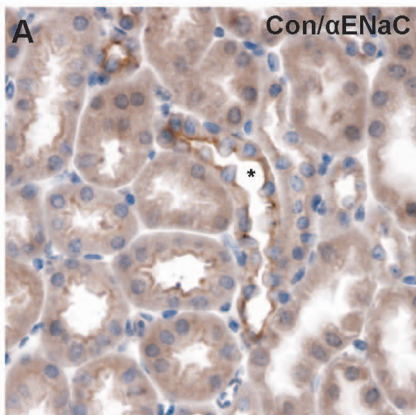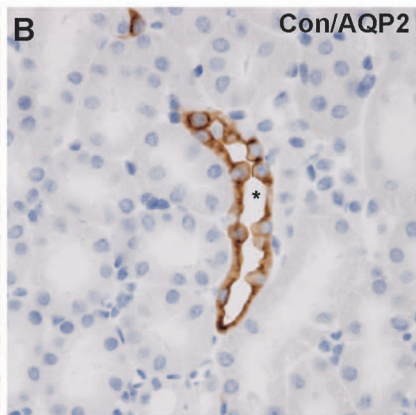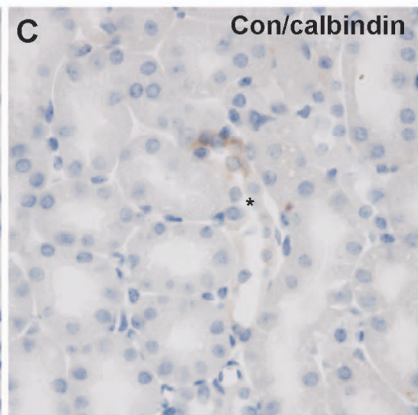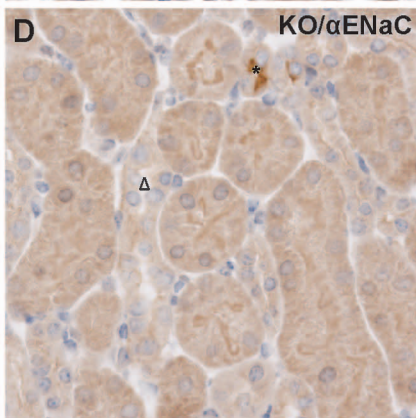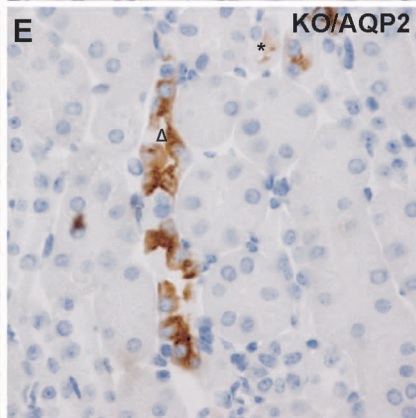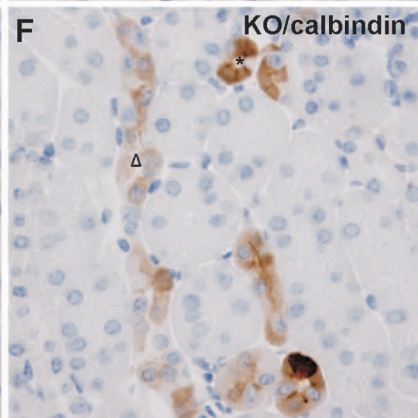

**Sup figure:** Immunohistochemistry using serial kidney sections from control (A-C) and knockout mice (D-F). Sections were incubated with anti- $\alpha$ ENaC antibody (A and D), anti-AQP2 antibody (B and E) and anti-calbindin antibody (C and F). In the early part of the CCD of control mice (AQP2 positive and with very weak calbindin staining, B-C), apical  $\alpha$ ENaC staining was observed (C, asterisks).  $\alpha$ ENaC staining was not observed in the early part of the CCD of knockout mice (D, triangles).
